# Supplementary material for: Imputation of high-density genotypes in the Fleckvieh cattle population
Source: PubMed Central journal article supplement (PMC3598996; doi:10.1186/1297-9686-45-3), 2013-02-13

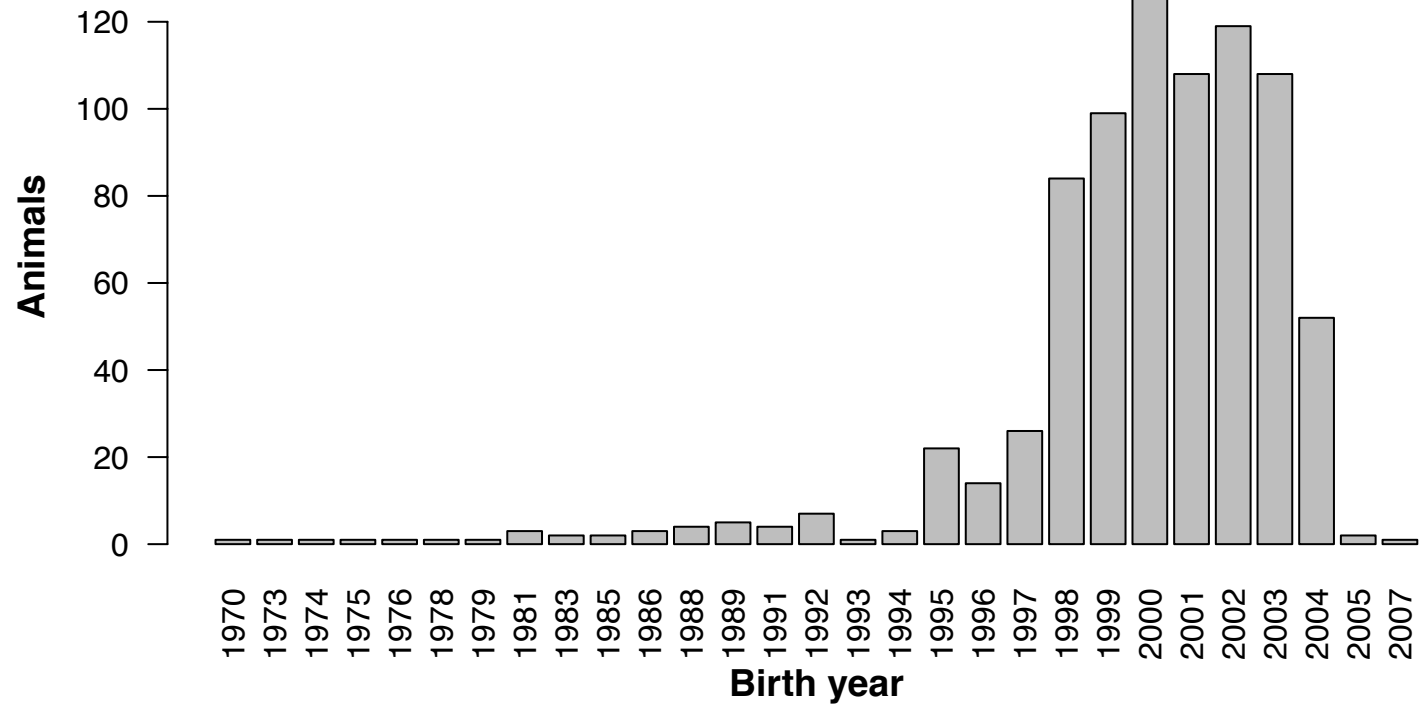

Supplement: 1297-9686-45-3-S1.pdf [file 1297-9686-45-3-S1.pdf]
