# Supplementary material for: Imputation of high-density genotypes in the Fleckvieh cattle population
Source: PubMed Central journal article supplement (PMC3598996; doi:10.1186/1297-9686-45-3), 2013-02-13
Supplement: 1297-9686-45-3-S3.pdf [file 1297-9686-45-3-S3.pdf]

## A *Beagle*

unphased  
reference  
population

unphased  
validation  
population

imputation with *Beagle*  
(version 3.2.1)

```
java -jar beagle.jar niterations=10  
unphased=reference.bgl unphased=validation.bgl  
markers=markers missing=0 out=output
```

## C *MiniMac*

unphased  
reference  
population

unphased  
validation  
population

Phasing with  
*Beagle* (version  
3.2.1)

```
java -jar beagle.jar niterations=10  
unphased=reference.bgl missing=0  
out=reference_haplotypes
```

Phasing with  
*Beagle* (version  
3.2.1)

```
java -jarsbeagle.jar niterations=10  
unphased=validation.bgl missing=0  
out=validation_haplotypes
```

Genotype imputation with *MiniMac*  
(stamp 2011.10.27)

```
minimac --refhaps reference_haplotypes --refsnpes reference_snps  
--haps validation_haplotypes --snps validation_snps --phased
```

## B *MaCH*

unphased  
reference  
population

unphased  
validation  
population

Phasing with *Beagle* (version 3.2.1)

```
java -jar beagle.jar niterations=10 unphased=reference.bgl missing=0  
out=reference_haplotypes
```

Calibration of the model parameters  
with *MaCH* (version 1.0.16.a)

```
mach1 --datfile validation_subset.dat --pedfile validation_subset.ped  
-s reference_snps -h reference_haplotypes --greedy --rounds 20 --prefix step1
```

Genotype imputation with *MaCH* (version 1.0.16.a)

```
mach1 --datfile validation.dat --pedfile validation.ped -s reference_snps -h  
reference_haplotypes --crossover step1.rec --errormap step1.erate --greedy --mle --mldetails  
--prefix step2
```

## D *findhap.f90*

unphased  
reference  
population

unphased  
validation  
population

Imputation with *findhap.f90* (version 2)

```
iters =5; maxlen=2000; minlen=200; steps=4
```
